# Supplementary material for: Distribution of Long-Range Linkage Disequilibrium and Tajima’s D Values in Scandinavian Populations of Norway Spruce (Picea abies)
Source: PubMed Central journal article supplement (PMC3656727; doi:10.1534/g3.112.005462), 2013-05-01
Supplement: supp_g3.112.005462_005462SI.pdf [file supp_g3.112.005462_005462SI.pdf]

**Distribution of long-range Linkage Disequilibrium and Tajima's D values in Scandinavian populations of Norway spruce (*Picea abies*)**

Hanna Larsson<sup>\*</sup>, Thomas Källman<sup>\*</sup>, Niclas Gyllenstrand<sup>§</sup>, Martin Lascoux<sup>\*</sup>

<sup>\*</sup>Department of Ecology and Genetics, EBC, Uppsala University, 752 36 Uppsala, Sweden

<sup>§</sup>Department of Plant Biology and Forest Genetics, Swedish University of Agricultural Sciences, Uppsala, 750 07 Uppsala, Sweden

Author for correspondence:

Hanna Larsson

Hanna.Larsson@ebc.uu.se, larsson.h77@gmail.com

Department of Ecology and Genetics, EBC, Uppsala University

Norbyvägen 18D, 752 36 Uppsala

Tel: +46 18 471 28 16, FAX: +46 18 471 64 25

**DOI:** 10.1534/g3.112.005462

**File S1**  
**Supporting Data**

An alignment file containing sequence data for all loci and individuals is available for download at  
<http://www.g3journal.org/lookup/suppl/doi:10.1534/g3.112.005462/-/DC1>.

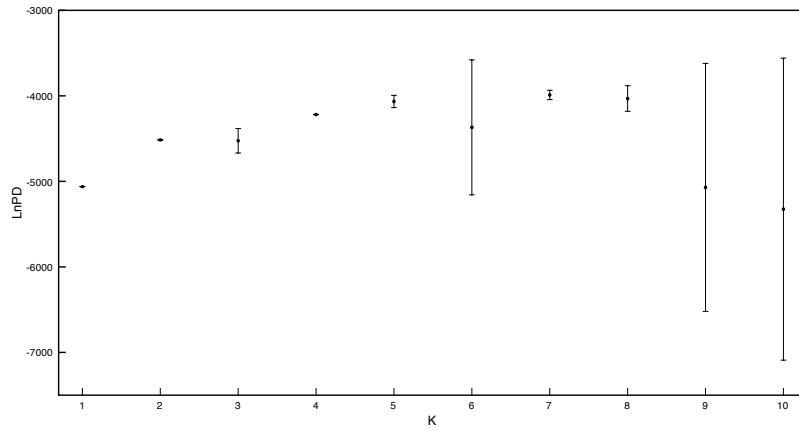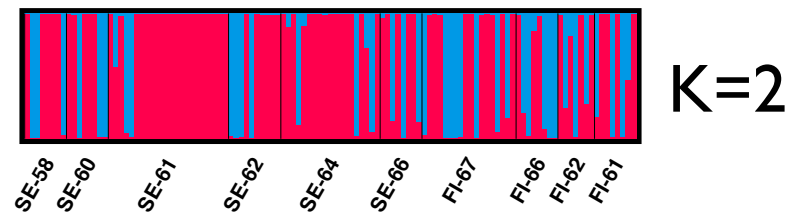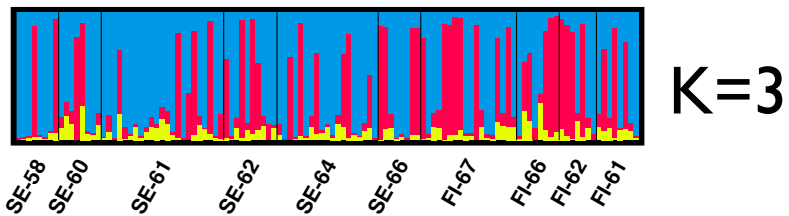

**Figure S1** Top figure shows the likelihoods of estimated number of clusters (K) obtained with the program STRUCTURE. The dot represents the mean likelihood over 10 structure runs and the lines represent the standard deviation of the estimate. The bottom two figures show individual assignment results averaged over the ten runs for K=2 and K=3. Note that populations are ordered from south to north in Sweden and then north to south in Finland. The lack of geographic pattern was equally evident for all additional number of clusters tested.

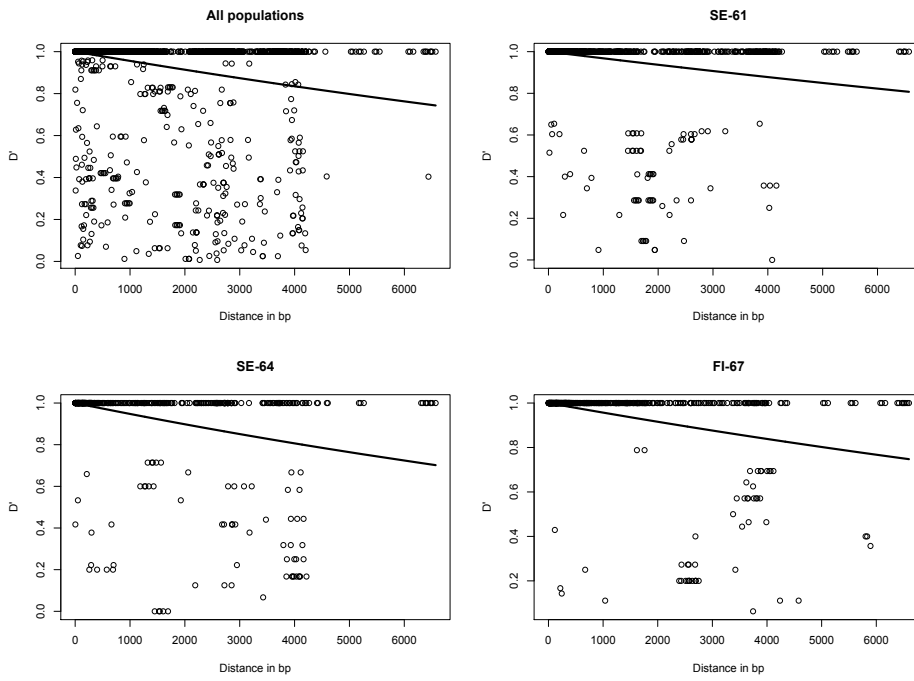

**Figure S2** Plot of  $D'$  vs. distance in base pairs across eleven loci for different subsets of populations. From top left to right bottom; a) all ten populations  $n=97$ , b) SE-61  $n=20$ , c) SE-64  $n=16$  and d) FI-67  $n=16$ .

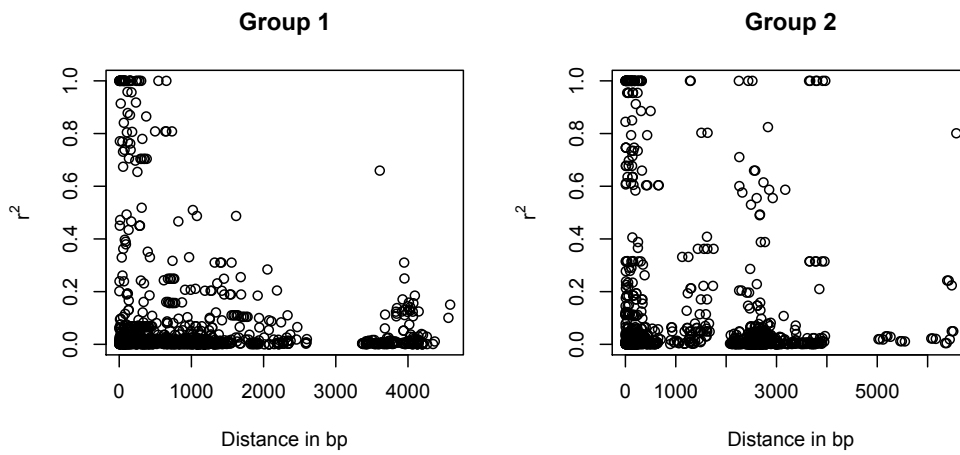

**Figure S3** Plot of the squared correlation of allele frequencies ( $r^2$ ) vs. distance in base pairs. Group 1 consists of the genes *PaCCA1*, *PaCDF1*, *PaCOL1* and *PaWS02746*. Group 2 consists of the genes *PaMFT1*, *PaFTL1*, *PaPRR1*, *PaPRR7*, *PaWS02749* and *PaZIP*.

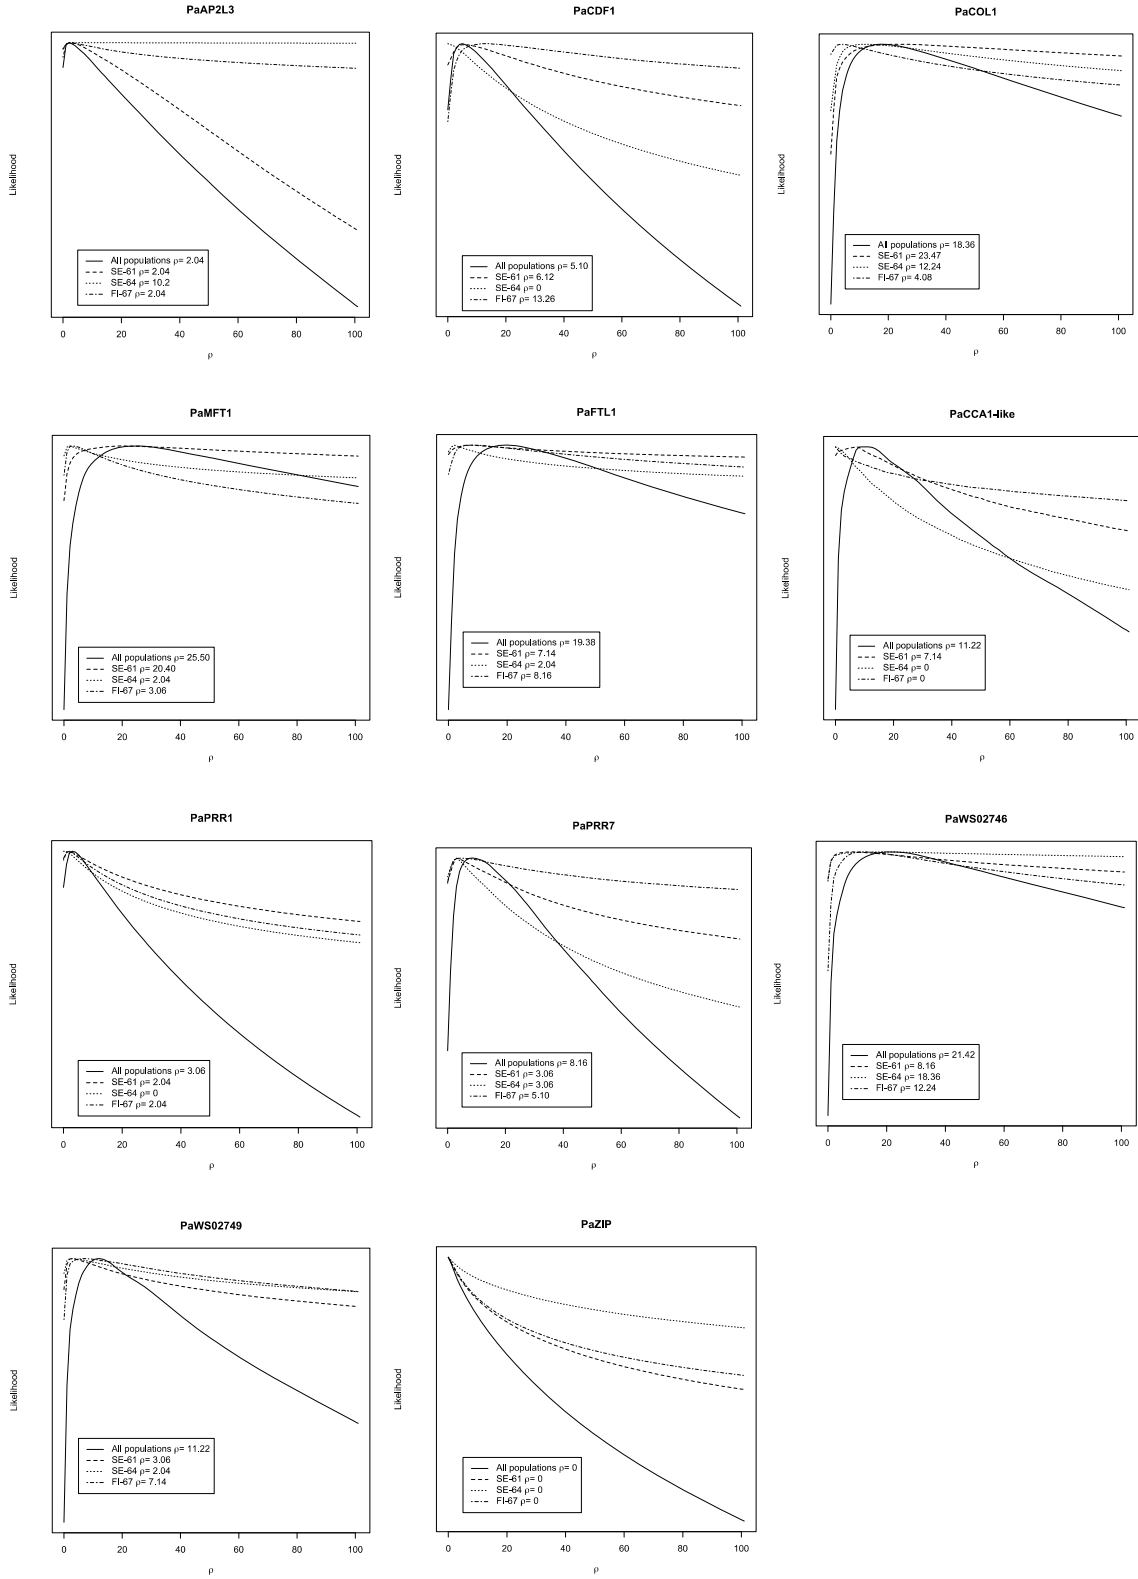

**Figure S4** Per locus likelihood curves for the estimate of  $\rho$  using all populations, SE-61, SE-64 and FI-67 respectively (see legend). Curves have been rescaled for comparison.

**Table S1 Table of primer sequences and PCR conditions for the genes amplified in this study.** Multiple primer sequences are given in cases where the gene was amplified in overlapping fragments. All PCRs were run for 35 cycles with an initial heating at 98° for 30 seconds and ending with a 5 minute extension at 72°.

| Gene             | Forward primer sequence    | Reverse primer sequence     | Denat.     | Ann.       | Elong.      |
|------------------|----------------------------|-----------------------------|------------|------------|-------------|
| <i>PaAP2L3</i>   | GGAAACAGGTTTATCTGGGTG      | AAGTGACCAAAGAAAGGCA         | 98°<br>10s | 60°<br>20s | 72°<br>3min |
| <i>PaCDF1</i>    | TGTAGAACGGGGTGAGTTG        | CTGAACCTGCTCTTGTAAATC       | 98°<br>10s | 60°<br>20s | 72°<br>3min |
| <i>PaCOL1</i>    | CAGCAGTGGAGAATGGTGAA       | CTGCATCCACATCCAATGAC        | 98°<br>10s | 60°<br>30s | 72° 30s     |
|                  | CCACCCTGGTCTGACTTTTTA      | GGAACAACCTCCGTATCCCTGA      | 98°<br>10s | 60°<br>30s | 72°<br>3min |
| <i>PaFT1</i>     | CAAGTTCAAATTCAAAGGTAG      | GGAGCATCTGGGTCTGTCAT        | 98°<br>10s | 61°<br>30s | 72° 40s     |
|                  | AATGTTGCGACCTGGTTTTT       | GAAGTGCTCCACAACCAACC        | 98°<br>10s | 60°<br>30s | 72° 30s     |
| <i>PaFT2</i>     | TGAGGACCTTCGCAACTTTT       | TGTCTGATTCATTCATGGCTTC      | 98°<br>10s | 63°<br>15s | 72°<br>3min |
| <i>PaCCA1</i>    | TATTCTCACTCTCAGCGGGG       | GGACAAAACCCACTCCAGACT       | 98°<br>10s | 63°<br>15s | 72°<br>3min |
| <i>PaPRR7</i>    | TATAAGGTTAATGAAGGGCTAG     | ATAAGATGTGAATGAGAATGAA      | 98°<br>10s | 59°<br>30s | 72°<br>1min |
|                  | TCTTTTGGGGTAAACAACCTCT     | AGAGATACTGATAGCCTTAC        | 98°<br>10s | 60°<br>20s | 72°<br>3min |
|                  | AAACCTGTTAGAAAGAACGAGC     | AGAGGCAAATTGTAAATATCCC      | 98°<br>10s | 60°<br>20s | 72°<br>3min |
| <i>PaPRR1</i>    | GGCCAGTCATCCTGAGTGCGAGTCAC | GGGCAATAAATAGTTTGTGAACAATTA | 98°<br>10s | 60°<br>20s | 72°<br>3min |
| <i>PaWS02746</i> | CAAGGCGGAGGATATTTCTG       | TATTTGGCTTGGGATTGAGC        | 98°<br>10s | 63°<br>15s | 72°<br>3min |
| <i>PaWS02749</i> | GCATATCTGAATTCACCTTGCTTC   | AAGACAACCTTATTTGATTTGATGGA  | 98°<br>10s | 60°<br>20s | 72°<br>3min |
| <i>PaZIP</i>     | CTATGGTTCGGGCGTCTAA        | CAGCACAGGGAGTTCAGGTA        | 98°<br>10s | 63°<br>30s | 72°<br>3min |

**Table S2** Estimates of population differentiation between all populations and between the more densely sampled populations SE-61, SE-64 and FI-67.

| Gene             | Global $F_{ST}$ for all populations | Global $F_{ST}$ between SE-61, SE-64 and FI-67 |
|------------------|-------------------------------------|------------------------------------------------|
| <i>PaAP2L3</i>   | 0.01305                             | 0.01035                                        |
| <i>PaCDF1</i>    | 0.01958                             | 0.01092                                        |
| <i>PaCOL1</i>    | 0.02505                             | 0.02748                                        |
| <i>PaMFT1</i>    | 0.01426                             | -0.03319                                       |
| <i>PaFTL1</i>    | 0.02948                             | 0.18542                                        |
| <i>PaCCA1</i>    | -0.00537                            | -0.01198                                       |
| <i>PaPRR7</i>    | -0.0004                             | 0.03142                                        |
| <i>PaPRR1</i>    | -0.01195                            | -0.00449                                       |
| <i>PaWS02746</i> | -0.02664                            | -0.01770                                       |
| <i>PaWS02749</i> | -0.02198                            | -0.00697                                       |
| <i>PaZIP</i>     | 0.04879                             | 0.03737                                        |
