# Supplementary material for: Distribution of Long-Range Linkage Disequilibrium and Tajima’s D Values in Scandinavian Populations of Norway Spruce (Picea abies)
Source: PubMed Central journal article supplement (PMC3656727; doi:10.1534/g3.112.005462), 2013-05-01
Supplement: supp_g3.112.005462_FigureS2.pdf [file supp_g3.112.005462_FigureS2.pdf]

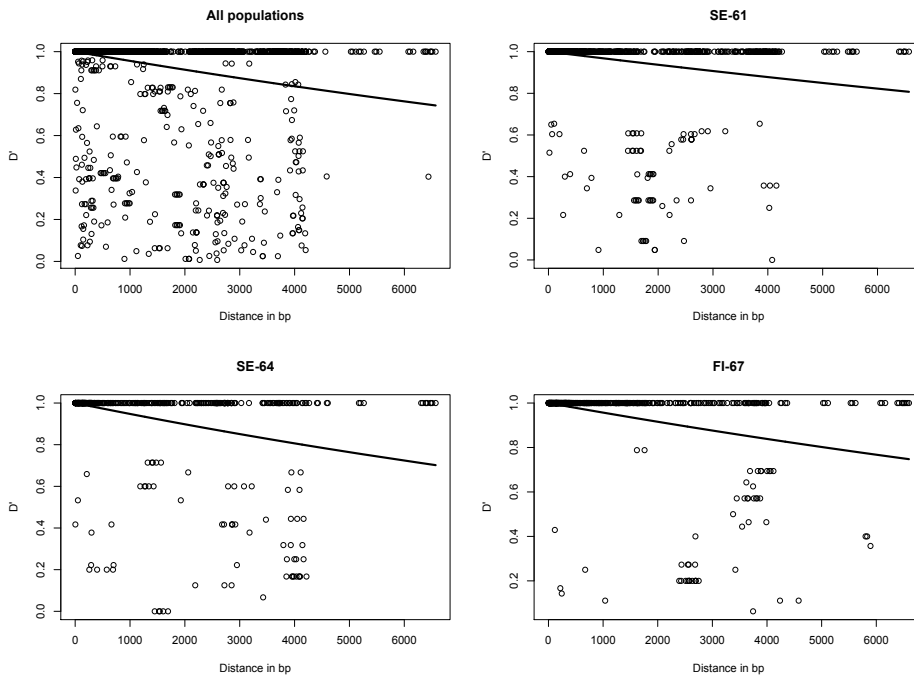

**Figure S2** Plot of  $D'$  vs. distance in base pairs across eleven loci for different subsets of populations. From top left to right bottom; a) all ten populations n=97, b) SE-61 n=20, c) SE-64 n=16 and d) FI-67 n=16.
