# Supplementary material for: Distribution of Long-Range Linkage Disequilibrium and Tajima’s D Values in Scandinavian Populations of Norway Spruce (Picea abies)
Source: PubMed Central journal article supplement (PMC3656727; doi:10.1534/g3.112.005462), 2013-05-01
Supplement: supp_g3.112.005462_FigureS3.pdf [file supp_g3.112.005462_FigureS3.pdf]

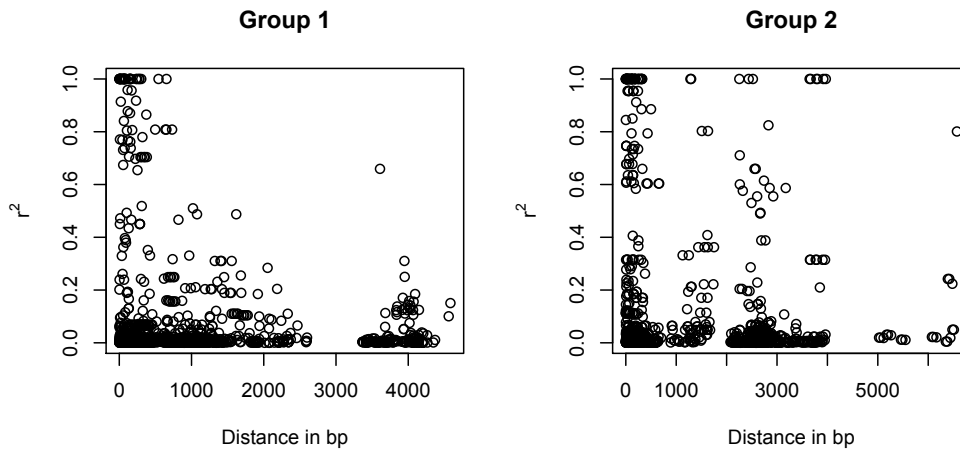

**Figure S3** Plot of the squared correlation of allele frequencies ( $r^2$ ) vs. distance in base pairs. Group 1 consists of the genes *PaCCA1*, *PaCDF1*, *PaCOL1* and *PaWS02746*. Group 2 consists of the genes *PaMFT1*, *PaFTL1*, *PaPRR1*, *PaPRR7*, *PaWS02749* and *PaZIP*.
