# Supplementary material for: Distribution of Long-Range Linkage Disequilibrium and Tajima’s D Values in Scandinavian Populations of Norway Spruce (Picea abies)
Source: PubMed Central journal article supplement (PMC3656727; doi:10.1534/g3.112.005462), 2013-05-01
Supplement: supp_g3.112.005462_FigureS4.pdf [file supp_g3.112.005462_FigureS4.pdf]

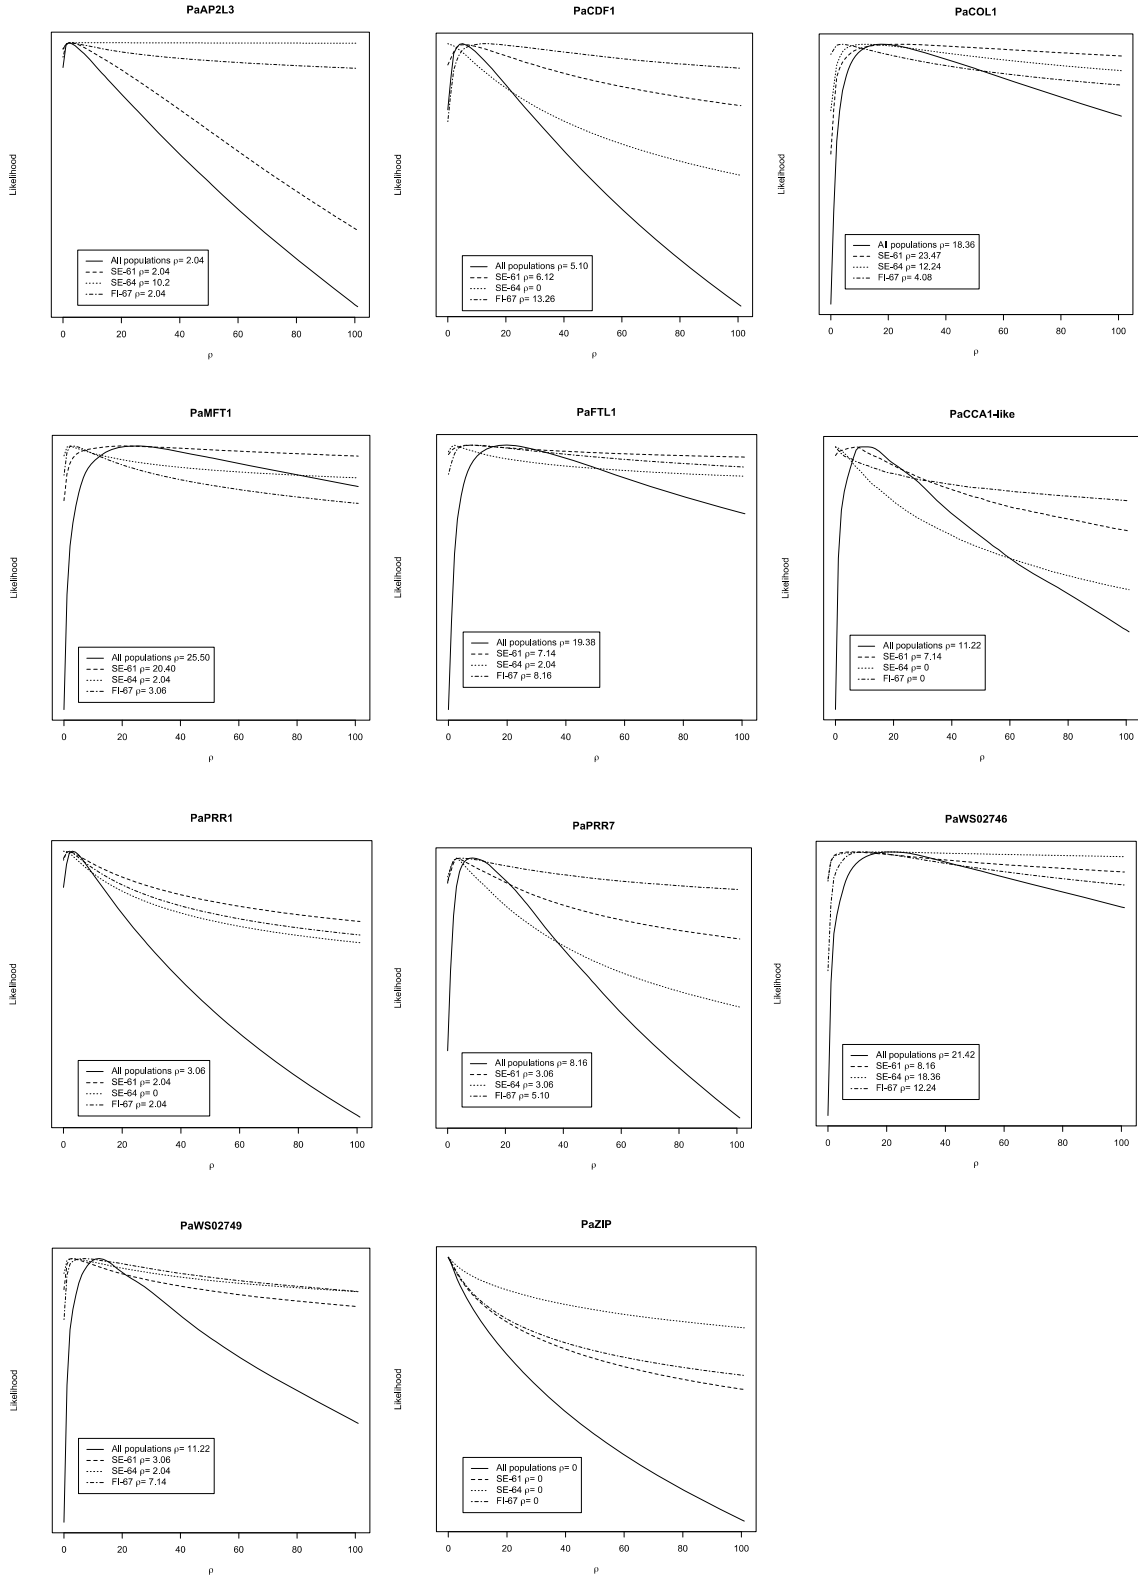

**Figure S4** Per locus likelihood curves for the estimate of  $\rho$  using all populations, SE-61, SE-64 and FI-67 respectively (see legend). Curves have been rescaled for comparison.
