# Supplementary material for: Distribution of Long-Range Linkage Disequilibrium and Tajima’s D Values in Scandinavian Populations of Norway Spruce (Picea abies)
Source: PubMed Central journal article supplement (PMC3656727; doi:10.1534/g3.112.005462), 2013-05-01
Supplement: supp_g3.112.005462_TableS1.pdf [file supp_g3.112.005462_TableS1.pdf]

**Table S1 Table of primer sequences and PCR conditions for the genes amplified in this study.** Multiple primer sequences are given in cases where the gene was amplified in overlapping fragments. All PCRs were run for 35 cycles with an initial heating at 98° for 30 seconds and ending with a 5 minute extension at 72°.

| Gene             | Forward primer sequence    | Reverse primer sequence     | Denat.     | Ann.       | Elong.      |
|------------------|----------------------------|-----------------------------|------------|------------|-------------|
| <i>PaAP2L3</i>   | GGAAACAGGTTTATCTGGGTG      | AAGTGACCAAAGAAAGGCA         | 98°<br>10s | 60°<br>20s | 72°<br>3min |
| <i>PaCDF1</i>    | TGTAGAACGGGGTGAGTTG        | CTGAACCTGCTCTTGTAAATC       | 98°<br>10s | 60°<br>20s | 72°<br>3min |
| <i>PaCOL1</i>    | CAGCAGTGGAGAATGGTGAA       | CTGCATCCACATCCAATGAC        | 98°<br>10s | 60°<br>30s | 72° 30s     |
|                  | CCACCCTGGTGCAGCTTTTAA      | GGAACAACCTCCGTATCCCTGA      | 98°<br>10s | 60°<br>30s | 72°<br>3min |
| <i>PaFT1</i>     | CAAGTTCAAATTCAAAGGTAG      | GGAGCATCTGGGTCTGTCAT        | 98°<br>10s | 61°<br>30s | 72° 40s     |
|                  | AATGTTGCGACCTGGTTTTT       | GAAGTGCTCCACAACCAACC        | 98°<br>10s | 60°<br>30s | 72° 30s     |
| <i>PaFT2</i>     | TGAGGACCTTCGCAACTTTT       | TGTCTGATTCATTCATGGCTTC      | 98°<br>10s | 63°<br>15s | 72°<br>3min |
| <i>PaCCA1</i>    | TATTCTCACTCTCAGCGGGG       | GGACAAAACCCACTCCAGACT       | 98°<br>10s | 63°<br>15s | 72°<br>3min |
| <i>PaPRR7</i>    | TATAAGGTTAATGAAGGGCTAG     | ATAAGATGTGAATGAGAATGAA      | 98°<br>10s | 59°<br>30s | 72°<br>1min |
|                  | TCTTTTGGGGTAAACAACCTCT     | AGAGATACACTGATAGCCTTAC      | 98°<br>10s | 60°<br>20s | 72°<br>3min |
|                  | AAACCTGTTAGAAAGAACGAGC     | AGAGGCAAATTGTAAATATCCC      | 98°<br>10s | 60°<br>20s | 72°<br>3min |
| <i>PaPRR1</i>    | GGCCAGTCATCCTGAGTGCGAGTCAC | GGGCAATAAATAGTTTGTGAACAATTA | 98°<br>10s | 60°<br>20s | 72°<br>3min |
| <i>PaWS02746</i> | CAAGGCGGAGGATATTTCTG       | TATTTGGCTTGGGATTGAGC        | 98°<br>10s | 63°<br>15s | 72°<br>3min |
| <i>PaWS02749</i> | GCATATCTGAATTCACCTTGCTTC   | AAGACAACCTTATTTGATTTGATGGA  | 98°<br>10s | 60°<br>20s | 72°<br>3min |
| <i>PaZIP</i>     | CTATGGTTCGGGCGTCTAA        | CAGCACAGGGAGTTCAGGTA        | 98°<br>10s | 63°<br>30s | 72°<br>3min |
