# Supplementary material for: Distribution of Long-Range Linkage Disequilibrium and Tajima’s D Values in Scandinavian Populations of Norway Spruce (Picea abies)
Source: PubMed Central journal article supplement (PMC3656727; doi:10.1534/g3.112.005462), 2013-05-01
Supplement: supp_g3.112.005462_TableS2.pdf [file supp_g3.112.005462_TableS2.pdf]

**Table S2** Estimates of population differentiation between all populations and between the more densely sampled populations SE-61, SE-64 and FI-67.

| Gene             | Global $F_{ST}$ for all populations | Global $F_{ST}$ between SE-61, SE-64 and FI-67 |
|------------------|-------------------------------------|------------------------------------------------|
| <i>PaAP2L3</i>   | 0.01305                             | 0.01035                                        |
| <i>PaCDF1</i>    | 0.01958                             | 0.01092                                        |
| <i>PaCOL1</i>    | 0.02505                             | 0.02748                                        |
| <i>PaMFT1</i>    | 0.01426                             | -0.03319                                       |
| <i>PaFTL1</i>    | 0.02948                             | 0.18542                                        |
| <i>PaCCA1</i>    | -0.00537                            | -0.01198                                       |
| <i>PaPRR7</i>    | -0.0004                             | 0.03142                                        |
| <i>PaPRR1</i>    | -0.01195                            | -0.00449                                       |
| <i>PaWS02746</i> | -0.02664                            | -0.01770                                       |
| <i>PaWS02749</i> | -0.02198                            | -0.00697                                       |
| <i>PaZIP</i>     | 0.04879                             | 0.03737                                        |
